# Supplementary material
Source: Springer Nature journal article supplement (https://www.springermedizin.de/resource/supplementary/12961_2014_350_MOESM4_ESM.pdf/9571118)
Supplement: MOESM4 [file 9571118]

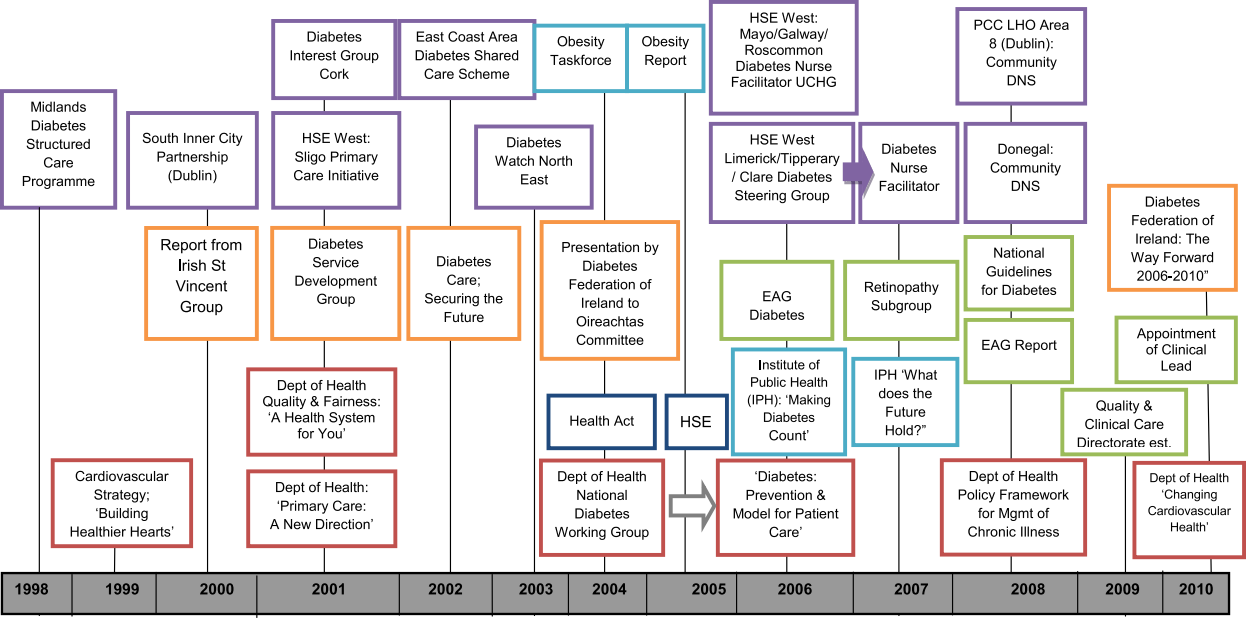

Midlands  
Diabetes  
Structured  
Care  
Programme

South Inner City  
Partnership  
(Dublin)

Diabetes  
Interest Group  
Cork

East Coast Area  
Diabetes Shared  
Care Scheme

Obesity  
Taskforce

Obesity  
Report

HSE West:  
Mayo/Galway/  
Roscommon  
Diabetes Nurse  
Facilitator UCHG

PCC LHO Area  
8 (Dublin):  
Community  
DNS

HSE West:  
Sligo Primary  
Care Initiative

Diabetes  
Watch North  
East

HSE West  
Limerick/Tipperary  
/ Clare Diabetes  
Steering Group

Diabetes  
Nurse  
Facilitator

Donegal:  
Community  
DNS

Report from  
Irish St  
Vincent  
Group

Diabetes  
Service  
Development  
Group

Diabetes  
Care;  
Securing the  
Future

Presentation by  
Diabetes  
Federation of  
Ireland to  
Oireachtas  
Committee

EAG  
Diabetes

Retinopathy  
Subgroup

National  
Guidelines  
for Diabetes

Diabetes  
Federation of  
Ireland: 'The  
Way Forward  
2006-2010'

Dept of Health  
Quality & Fairness:  
'A Health System  
for You'

Dept of Health:  
'Primary Care:  
A New Direction'

Health Act

HSE

Institute of  
Public Health  
(IPH): 'Making  
Diabetes  
Count'

IPH 'What  
does the  
Future  
Hold?'

EAG Report

Appointment  
of Clinical  
Lead

Quality &  
Clinical Care  
Directorate est.

Cardiovascular  
Strategy;  
'Building  
Healthier Hearts'

Dept of Health  
National  
Diabetes  
Working Group

'Diabetes:  
Prevention &  
Model for Patient  
Care'

Dept of Health  
Policy Framework  
for Mgmt of  
Chronic Illness

Dept of Health  
'Changing  
Cardiovascular  
Health'

1998 1999 2000 2001 2002 2003 2004 2005 2006 2007 2008 2009 2010
